# Supplementary material
Source: Royal Society of Chemistry journal article supplement (doi:10.1039/d6ta00569a)
Supplement: d6ta00569a1.pdf [file d6ta00569a1.pdf]

# Gradient Inverse Temperature Crystallization for High-Quality MAPbBr<sub>3</sub> Perovskite Single Crystals and Supreme-Sensitivity X-ray Detectors

Shuo-Hua Han,<sup>†a</sup> Lu-Di Zhang,<sup>†a</sup> Yu-Cheng Liu,<sup>\*b</sup> Hong-Jian Feng<sup>\*a</sup>

<sup>a</sup> School of Physics, Northwest University, Xi'an 710127, P. R. China.

<sup>b</sup> School of Materials Science and Engineering, Shaanxi Normal University, Xi'an 710119, P. R. China.

\* Corresponding authors. E-mail addresses: [hjfeng@nwu.edu.cn](mailto:hjfeng@nwu.edu.cn) (Hong-Jian Feng), [liuyc@snnu.edu.cn](mailto:liuyc@snnu.edu.cn) (Yu-Cheng Liu).

<sup>†</sup> Equal contribution.

## Experimental Section

**Chemicals and Reagents:** Lead bromide (PbBr<sub>2</sub>, 99.0%) and N,N-Dimethylformamide (DMF, ≥99.8%) were purchased from Aladdin Reagent Ltd., China. Methylamine Hydrobromide (MABr, 99.5%) were purchased from Xi'an yuri Solar Co., Ltd. . High-purity gold electrode material was purchased from a commercial source. All the chemicals were used as received without further purification.

**Growth of Perovskite Single Crystals:** A MAPbBr<sub>3</sub> precursor solution with a stoichiometric molar ratio of 1.2:1 was prepared by dissolving 0.671 g of methylammonium bromide (MABr, 6 mmol) and 1.834 g of lead bromide (PbBr<sub>2</sub>, 5.0 mmol) in 4 mL of N,N-dimethylformamide (DMF) solvent. The solution was magnetically stirred at room temperature (≈25°C) for 1 hour and subsequently filtered through a 0.22 μm PTFE filter into a 40 mm × 35 mm glass container. Subsequently, the glass container was placed in an oil bath for heating. After the solution has been cooled to room temperature, the crystal can be retrieved.

**Device Fabrication:** Under vacuum conditions, gold electrodes with a thickness of 100 nm were deposited on both sides of the MAPbBr<sub>3</sub> single crystal to fabricate a sandwich-structured device. The electrode area was 4 mm<sup>2</sup>. One electrode was affixed to a gold-

coated substrate using carbon paste, while the other electrode was connected to a gold wire using carbon paste.

**Characterizations:** The surface morphology of MAPbBr<sub>3</sub> samples was characterized using a Thermo Scientific Apreo S scanning electron microscope (SEM). X-ray diffraction (XRD) 2θ scans of MAPbBr<sub>3</sub> were performed using a Bruker D8 Advance. The target source is Cu, with a wavelength of 1.540598 Å. High-resolution XRD rocking curves and phi scans of the MAPbBr<sub>3</sub> single crystal were measured using an X'Pert Pro MRD. The ultraviolet-visible (UV-Vis) absorption spectrum of the MAPbBr<sub>3</sub> single crystal was obtained using a UV-3600 spectrophotometer equipped with an integrating sphere accessory. The steady-state photoluminescence (PL) and time-resolved photoluminescence (TRPL) of MAPbBr<sub>3</sub> single crystals were investigated using an Edinburgh FLS1000. For the time-resolved photoluminescence (TRPL) test, the excitation wavelength was set to 330 nm, the emission wavelength was 544 nm, the slits were set to 2 during the test, and the initial photon count rate was adjusted to 3000 cps.

**X-ray Detector Characterization:** To reduce electromagnetic interference and the impact of ambient light, we measured the X-ray detection performance of the SC detector in a homemade lead box. The X-ray source used was an X-ray tube equipped with a tungsten target (Spellman, XRB150PN600), with an acceleration voltage of 45 kV. The tube current was adjusted between 1 and 4 mA to achieve the desired X-ray dose rate. To further reduce the X-ray dose rate, a 3 mm thick aluminum plate was used as an attenuator between the X-ray source and the detector. Prior to the measurement, the X-ray dose rate was precisely calibrated using a Fluke silicon diode dosimeter (RaySafe X2). A precision source meter (FS380) was used to provide an electric field for the detector, and the X-ray response current was recorded.

**The time-resolved photoluminescence was fitted using a double exponential decay function. The specific formula is as follows:**

$$I(t) = A_1 \exp(-t/\tau_1) + A_2 \exp(-t/\tau_2)$$

where  $I(t)$  is the photoluminescence intensity at time  $t$ ;  $\tau_1$  and  $\tau_2$  represent the time constants for the fast and slow decay components, respectively; and  $A_1$  and  $A_2$  are the corresponding fractional amplitude coefficients.

**Average lifetime ( $\tau_{ave}$ ) formula:**

$$\tau_{ave} = \frac{A_1\tau_1^2 + A_2\tau_2^2}{A_1\tau_1 + A_2\tau_2}$$

**The relationship between the trap density and VTFL was described by the following formula:**

$$n_{trap} = \frac{2\varepsilon_0\varepsilon V_{TFL}}{qL^2}$$

where  $\varepsilon_0$  is the vacuum permittivity,  $q$  and  $L$  are the elementary charge and crystal thickness, respectively, and  $\varepsilon$  is the dielectric constant of the perovskite SC (25.5)<sup>1</sup>.

**The data is fitted using the modified Hecht equation to obtain the  $\mu\tau$  product, with the formula as follows:**

$$I = \frac{I_0\mu\tau V \left(1 - \exp\left(-\frac{L^2}{\mu\tau V}\right)\right)}{L^2 \left(1 + \frac{LS}{V\mu}\right)}$$

where  $I_0$  is the saturation photocurrent, and  $L$  and  $V$  are the thickness of the single crystal and the applied voltage, respectively.

**The sensitivity calculation formula for X-ray detectors:**

$$S = \frac{J_p - J_d}{A \times D}$$

In the formula,  $J_p$  and  $J_d$  represent the X-ray-induced photocurrent and the dark current, respectively,  $A$  denotes the effective surface area under X-ray irradiation, and  $D$  stands for the X-ray dose rate.

**The formula for calculating the signal-to-noise ratio:**

$$SNR = \frac{I_{signal}}{I_{noise}}$$

In this formula,  $I_{signal}$  represents the signal current (its value is the average photocurrent minus the average dark current), and  $I_{noise}$  denotes the noise current.

$$I_{noise} = \sqrt{\frac{1}{N} \sum_i^N (I_i - I_p)^2}$$

### **Details of DFT calculations for intrinsic defects in MAPbBr<sub>3</sub> materials :**

All first-principles calculations in this study were conducted based on density functional theory (DFT) using the PWmat software package.<sup>2, 3</sup> To systematically investigate defect properties, a 2×2×2 supercell model was constructed, and twelve possible intrinsic point defects in MAPbBr<sub>3</sub> were comprehensively examined, including three vacancy defects ( $V_{MA}$ ,  $V_{Pb}$ ,  $V_{Br}$ ), three interstitial defects ( $MA_i$ ,  $Pb_i$ ,  $Br_i$ ), and six substitutional defects ( $MA_{Pb}$ ,  $Pb_{MA}$ ,  $MA_{Br}$ ,  $Pb_{Br}$ ,  $Br_{MA}$ ,  $Br_{Pb}$ ). Structural optimization was performed using the GGA-PBE functional, with a plane-wave cutoff energy of 680 eV, a k-point mesh of 2×2×2, and a convergence criterion set to a maximum atomic force of less than 0.02 eV/Å. Self-consistent calculations were further carried out with the HSE06 hybrid functional to enhance the accuracy of electronic structure descriptions.

**Under thermodynamic equilibrium growth conditions, the existence of MAPbBr<sub>3</sub> must satisfy:**

$$\mu_{CH_3NH_3} + \mu_{Pb} + 3\mu_{Br} = \Delta H(CH_3NH_3PbBr_3) = -6.60 \text{ eV},$$

where  $\mu_i$  denotes the chemical potential of constituent element  $i$  relative to its most stable phase, and  $\Delta H(CH_3NH_3PbBr_3)$  represents the formation enthalpy of MAPbBr<sub>3</sub>. For the chemical potential of the CH<sub>3</sub>NH<sub>3</sub> group, the body-centered cubic (bcc) structure of CH<sub>3</sub>NH<sub>3</sub> is adopted as the reference phase, following the structural selection scheme used for Cs.<sup>4,5</sup> To prevent the formation of competing phases such as PbBr<sub>2</sub> and rock-salt structured CH<sub>3</sub>NH<sub>3</sub>Br, the following additional constraints must be satisfied:

$$\mu_{CH_3NH_3} + \mu_{Br} < \Delta H(CH_3NH_3Br) = -3.89 \text{ eV},$$

$$\mu_{Pb} + 2\mu_{Br} < \Delta(PbBr_2) = -2.60 \text{ eV}.$$

**The defect formation energy was calculated using the following formula<sup>6-9</sup>:**

$$E(X) = E_{total}(X) - E_{bulk} + \sum_i n_i \mu_i + qE_F + E_{corr}$$

where  $E_{total}(X)$  represents the total energy of the defective system,  $E_{bulk}$  denotes the total energy of the defect-free bulk system,  $\mu_i$  represents the atomic chemical potential,  $q$  indicates the net charge of the system,  $E_F = \epsilon + E_{VBM}$  corresponds to the external electron chemical potential, and  $E_{corr}$  denotes the energy correction for finite-size and mirror charge effects. It should be noted that charging of the defect was achieved by adjusting the total number of electrons within the framework of the gel model.

**Transition Level Formula:**

$$\epsilon(q_1/q_2) = \frac{E^f(X^{q_1}; E_F = 0) - E^f(X^{q_2}; E_F = 0)}{q_2 - q_1}$$

Where  $E^f(X^q; E_F = 0)$  represents the formation energy of defect  $X$  in charge state  $q$  when the Fermi level is at the valence band maximum ( $E_F = 0$ ).

**Detailed Comparative Analysis Between MAPbBr<sub>3</sub> and CsPbBr<sub>3</sub>:**

From the intrinsic properties of the material, the presence of organic methylammonium (MA<sup>+</sup>) cations in MAPbBr<sub>3</sub> significantly enhances the dynamic flexibility and overall stability of the crystal lattice.<sup>10</sup> The inorganic lead-bromide octahedral framework is stabilized by MA<sup>+</sup> cations via hydrogen bonding, which endows MAPbBr<sub>3</sub> with strong defect tolerance and facilitates the relaxation of lattice strain during the crystallization process.<sup>11</sup> Therefore, the intrinsic defect density of MAPbBr<sub>3</sub> single crystals is inherently 1–2 orders of magnitude lower than that of inorganic CsPbBr<sub>3</sub> single crystals.<sup>12, 13</sup> Excellent carrier transport characteristics and charge collection efficiency are endowed to MAPbBr<sub>3</sub> single crystals by its lower intrinsic defect density and higher carrier mobility-lifetime ( $\mu\tau$ ) product. An ultrahigh detection sensitivity at the level of hundreds of thousands is finally achieved. In sharp

contrast, the sensitivity of state-of-the-art CsPbBr<sub>3</sub> detectors is currently limited to the level of tens of thousands.<sup>14, 15</sup>

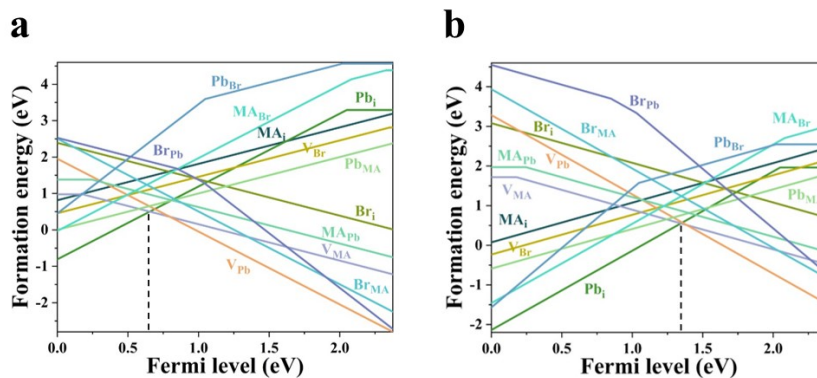

**Figure S1.** The formation energies of intrinsic point defects in MAPbBr<sub>3</sub> at different chemical potential points: (a) Moderate, (b) Bromine-poor/lead-rich.

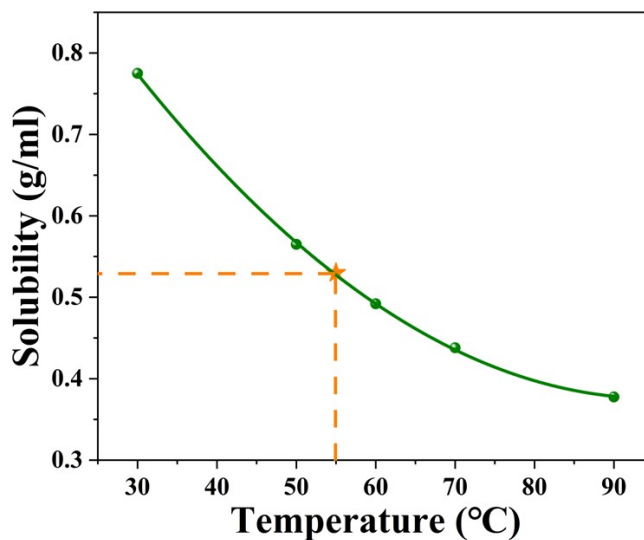

**Figure S2.** Temperature-dependent solubility curve of MAPbBr<sub>3</sub> in DMF.

**nucleation stage**

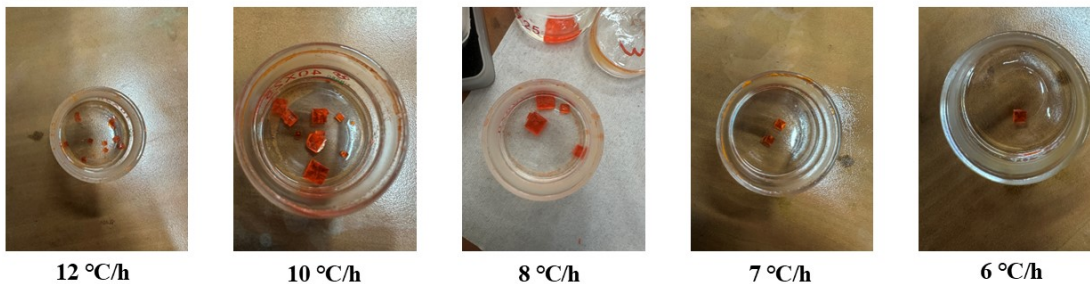

**growth stage**

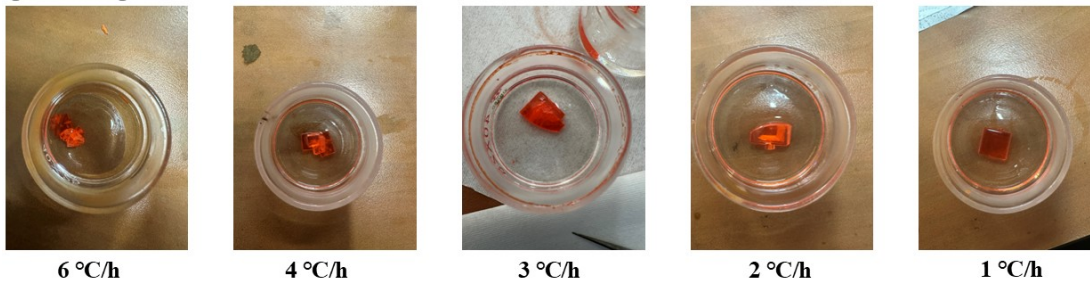

**Figure S3.** Photographs of single crystals grown at different heating rates during the nucleation and growth stages.

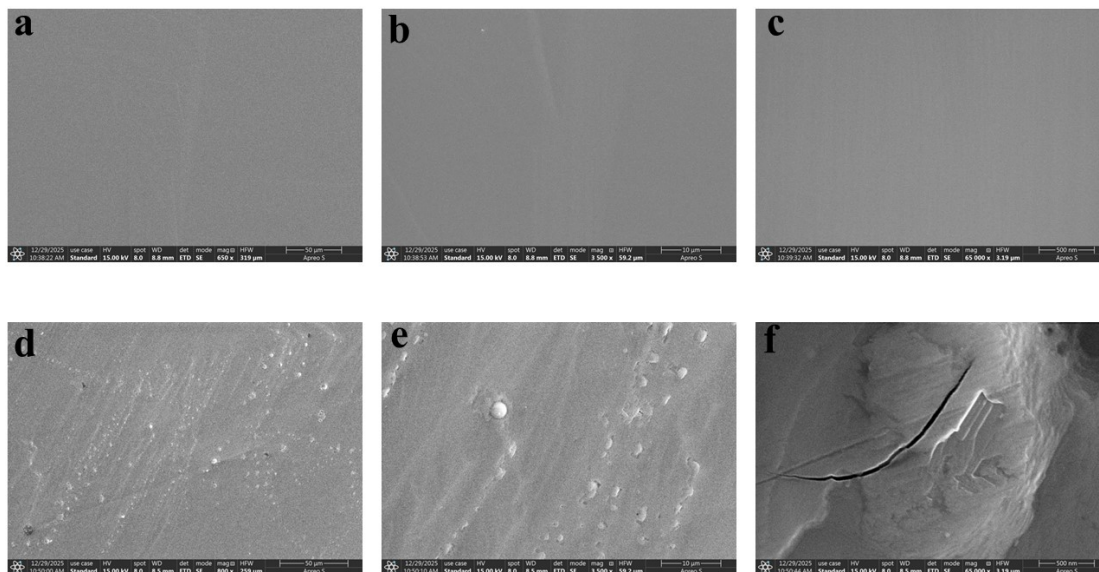

**Figure S4.** (a), (b), (c) are SEM images of the G-ITC SC under different scale bars; (d), (e), (f) are SEM images of the ITC SC under different scale bars.

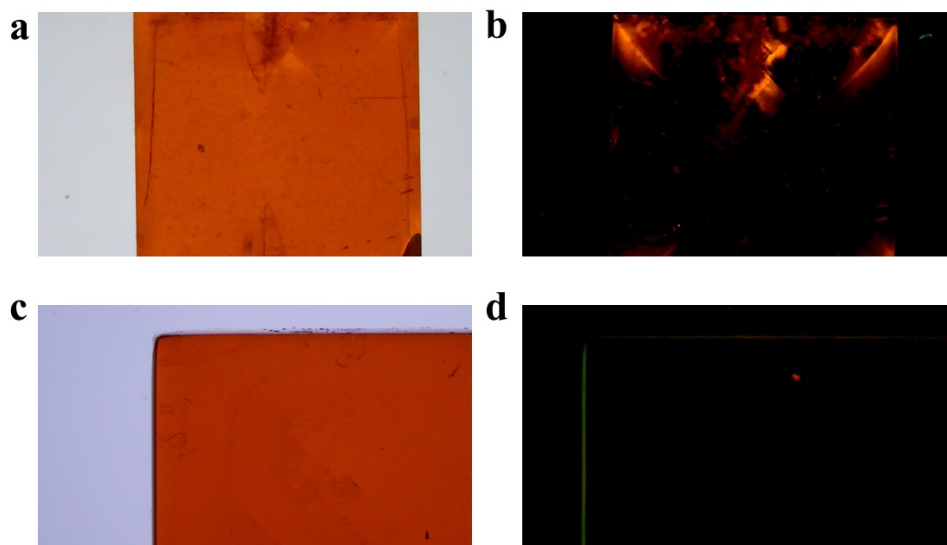

**Figure S5.** Micrographs of single crystals grown by different methods. (a),(b): Conventional and cross-polarized micrographs of ITC-grown SC. (c),(d): Conventional and cross-polarized micrographs of G-ITC-grown SC.

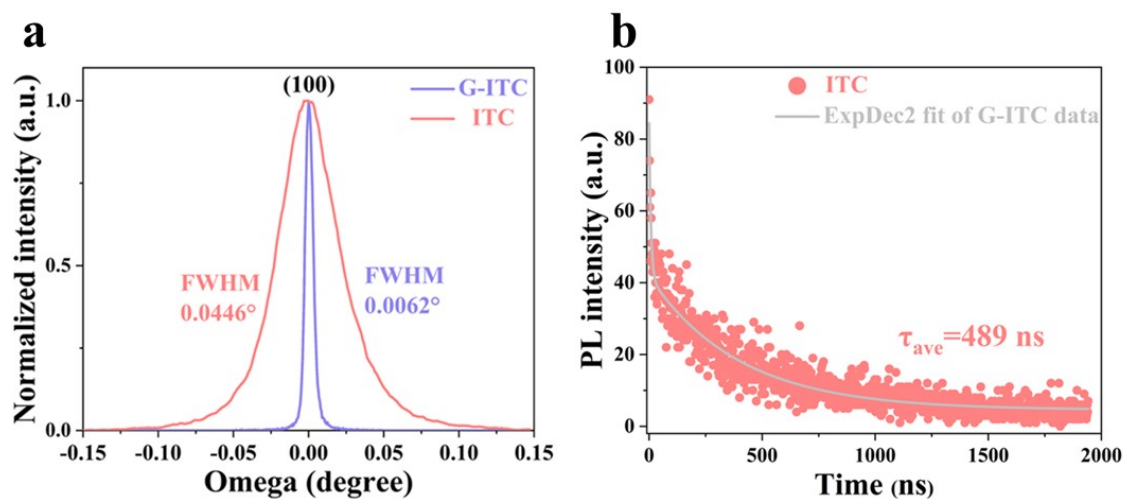

**Figure S6.** (a) High-resolution XRD rocking curves of the (100) diffraction peak of  $\text{MAPbBr}_3$  SCs grown by the G-ITC and ITC methods. (b) Time-Resolved Photoluminescence of  $\text{MAPbBr}_3$  SCs grown by ITC method.

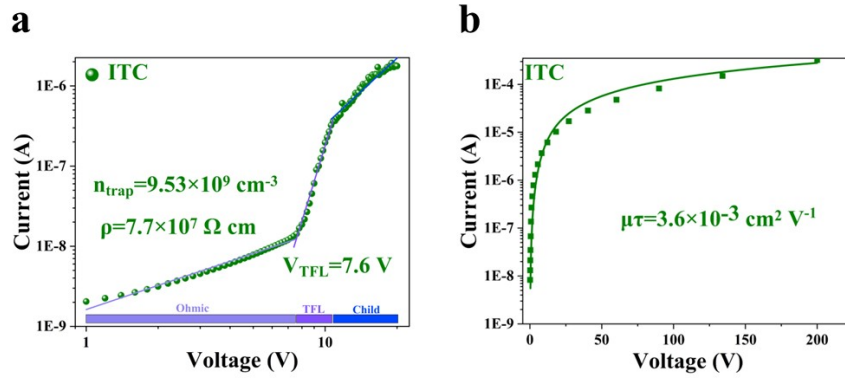

**Figure S7.** (a) Measurement of trap density and resistivity in SCs grown by ITC method using the Space-Charge-Limited Current (SCLC) method. (b) Bias Voltage-Dependent Photoconductivity Measurements of Single Crystals Grown by the ITC Method.

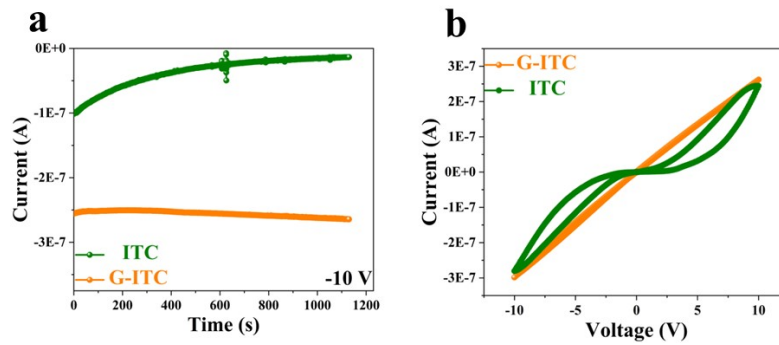

**Figure S8.** Dark current characteristics of ITC and G-ITC fabricated MAPbBr<sub>3</sub> SC devices. (a) Current-time curves under -10 V constant bias; (b) Cyclic I-V curves from -10 V to 10 V.

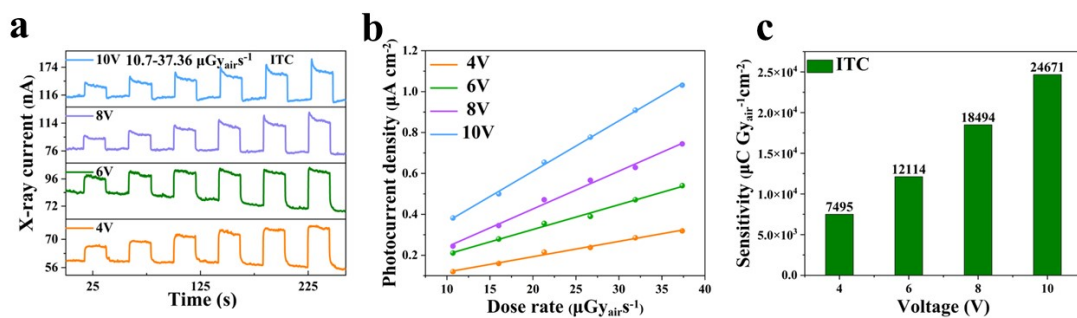

**Figure S9.** X-ray detectors fabricated from MAPbBr<sub>3</sub> single crystals grown by the ITC method. (a) X-ray response current at different bias voltages and dose rates. (b) Graph of the variation of X-ray photocurrent density with dose rate under different external biases. (c) Sensitivity of X-ray devices within a bias range of 4-10V.

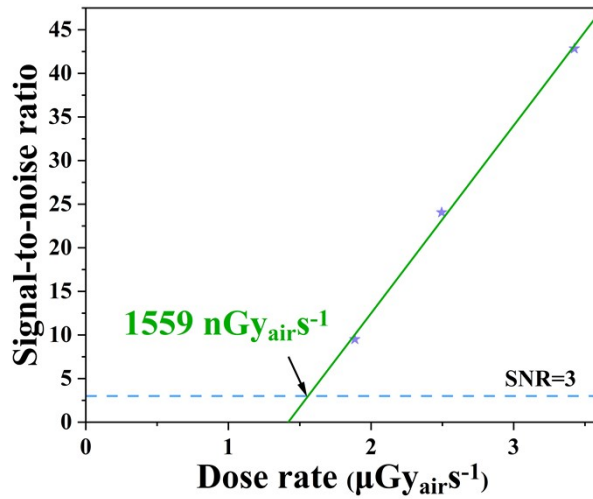

**Figure S10.** Signal-to-noise ratio (SNR) of the detector fabricated from single crystals grown by the ITC method.

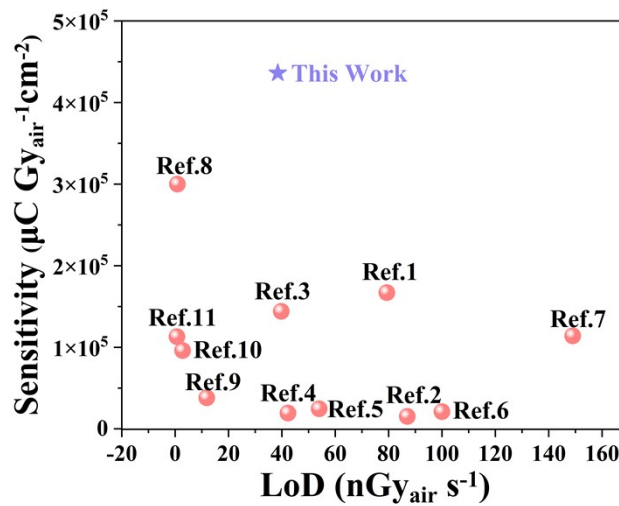

**Figure S11.** Comparison of sensitivity and low detection limit for X-ray detectors based on MAPbBr<sub>3</sub> SCs grown by different methods.

**Table S1.** Detailed TRPL fitting parameters for MAPbBr<sub>3</sub> single crystals grown by G-ITC and ITC methods.

|       | $A_1$   | $\tau_1(\text{ns})$ | $A_2$   | $\tau_2(\text{ns})$ | $\tau_{ave}(\text{ns})$ |
|-------|---------|---------------------|---------|---------------------|-------------------------|
| G-ITC | 5530.90 | 1888.46             | 1676.48 | 4823.09             | 3169                    |
| ITC   | 19.25   | 79.69               | 30.10   | 528.88              | 489                     |

**Table S2.** A Summary of the Characterization of MAPbBr<sub>3</sub> SCs and the Optoelectronic Performance of X-ray Detectors Fabricated Therefrom.

| Ref.      | Methods                      | FWHM of rocking curve (°) | PL peak (nm) | $\tau$ (ns) | $n_{\text{trap}}$ ( $\times 10^9 \text{ cm}^{-3}$ ) | Electrical resistivity ( $\Omega \text{ cm}$ ) | $\mu\tau$ ( $\times 10^{-2} \text{ cm}^2 \text{ V}^{-1}$ ) | LoD ( $\text{nGy}_{\text{air}}\text{s}^{-1}$ ) | Sensitivity ( $\mu\text{C Gy}_{\text{air}}^{-1}\text{cm}^{-2}$ ) |
|-----------|------------------------------|---------------------------|--------------|-------------|-----------------------------------------------------|------------------------------------------------|------------------------------------------------------------|------------------------------------------------|------------------------------------------------------------------|
| 1         | SS-ITC                       | 0.0346                    | —            | 1658        | 7.93                                                | —                                              | 1.73                                                       | 79.33                                          | $1.67 \times 10^5$                                               |
| 16        | LDSC                         | 0.0096                    | 540          | 1099        | 4.5                                                 | —                                              | 1.495                                                      | —                                              | 2181                                                             |
| 17        | Laser-assisted               | —                         | 538          | 1380        | 190                                                 | —                                              | —                                                          | 39.8                                           | $1.44 \times 10^5$                                               |
| 18        | LTGC                         | 0.0190                    | 547          | 815         | 6.7                                                 | —                                              | —                                                          | —                                              | —                                                                |
| 19        | VEC                          | 0.0092                    | 551          | 1150        | 2.280                                               | —                                              | —                                                          | 54                                             | 24552                                                            |
| 20        | Si-integrated                | —                         | —            | 692         | 1-10                                                | —                                              | —                                                          | <100                                           | $2.1 \times 10^4$                                                |
| 21        | Low-temperature hot-pressing | —                         | —            | —           | 3.040                                               | $2.08 \times 10^7$                             | 0.782                                                      | 149                                            | $1.14 \times 10^5$                                               |
| 22        | Silicone-Assisted            | 0.0052                    | —            | —           | 0.215                                               | —                                              | 0.11                                                       | 0.85                                           | $3 \times 10^5$                                                  |
| 23        | ITC.1                        | —                         | 559          | —           | —                                                   | —                                              | —                                                          | 11.84                                          | $3.81 \times 10^4$                                               |
| 24        | ITC.2                        | —                         | —            | —           | —                                                   | —                                              | —                                                          | 2.8                                            | 96000                                                            |
| 25        | ITC.3                        | 0.0140                    | 542          | 22.2        | —                                                   | —                                              | —                                                          | 0.7                                            | $1.13 \times 10^5$                                               |
| 26        | ITC.4                        | 0.0080                    | 533          | 39.89       | —                                                   | $8.28 \times 10^7$                             | —                                                          | 87                                             | 15280                                                            |
| 27        | PTG                          | 0.0080                    | 538          | 1002        | 4.250                                               | —                                              | —                                                          | 670                                            | 7275                                                             |
| 28        | With CF3-PABr                | 0.0090                    | —            | 85          | 23.20                                               | —                                              | 6.0                                                        | 1.3                                            | $1.088 \times 10^5$                                              |
| 29        | CSG                          | —                         | —            | —           | 0.822                                               | —                                              | 0.33                                                       | 15.7                                           | $2.35 \times 10^5$                                               |
| 30        | ITC.5                        | 0.0128                    | 540          | 176         | 6.290                                               | —                                              | 0.142                                                      | 17.8                                           | $5.4 \times 10^4$                                                |
| 31        | ITC.6                        | —                         | 576.6        | 63          | 0.945                                               | $8.82 \times 10^7$                             | 1.6                                                        | 42.3                                           | 19370                                                            |
| This work | ITC                          | 0.0428                    | 549          | 489         | 9.530                                               | $7.7 \times 10^7$                              | 0.36                                                       | 1559                                           | 24671                                                            |
| This work | G-ITC                        | 0.0055                    | 549          | 3169        | 0.473                                               | $5.8 \times 10^7$                              | 1.6                                                        | 38.5                                           | $4.36 \times 10^5$                                               |

## References

1. F. Yu, Y. Song, L. Wang, Y. Yang, J. Wang, X. Shen, B. Jin, H. Song, Y. Fang and Q. Dong, *Small*, 2025, **21**, 2407109.
2. W. Jia, Z. Cao, L. Wang, J. Fu, X. Chi, W. Gao and L.-W. Wang, *Computer Physics Communications*, 2013, **184**, 9-18.

3. W. Jia, J. Fu, Z. Cao, L. Wang, X. Chi, W. Gao and L.-W. Wang, *Journal of Computational Physics*, 2013, **251**, 102-115.
4. T. Shi, W.-J. Yin, F. Hong, K. Zhu and Y. Yan, *Applied Physics Letters*, 2015, **106**.
5. W.-J. Yin, T. Shi and Y. Yan, *Applied physics letters*, 2014, **104**.
6. C. Freysoldt, B. Grabowski, T. Hickel, J. Neugebauer, G. Kresse, A. Janotti and C. G. Van de Walle, *Reviews of modern physics*, 2014, **86**, 253-305.
7. Z.-J. Suo, J.-W. Luo, S.-S. Li and L.-W. Wang, *Physical Review B*, 2020, **102**, 174110.
8. J. Xiao, K. Yang, D. Guo, T. Shen, H.-X. Deng, S.-S. Li, J.-W. Luo and S.-H. Wei, *Physical Review B*, 2020, **101**, 165306.
9. J.-H. Yang, W.-J. Yin, J.-S. Park and S.-H. Wei, *Scientific reports*, 2015, **5**, 16977.
10. T. Yin, Y. Fang, X. Fan, B. Zhang, J.-L. Kuo, T. J. White, G. M. Chow, J. Yan and Z. X. Shen, *Chemistry of Materials*, 2017, **29**, 5974-5981.
11. X. Ma, X. Tian, E. Stippell, O. V. Prezhdo, R. Long and W.-H. Fang, *Journal of the American Chemical Society*, 2024, **146**, 29255-29265.
12. R. Zha, L. He, T. Shi and M. Zhang, *Advanced Composites Hybrid Materials*, 2026.
13. W. Jia, Y. Li, Y. Liu, Z. Wei, S. Liu, C. Liu, D. C. Onwudiwe, B. S. Bae, Y. Zhou and X. Xu, *ACS Photonics*, 2025, **13**, 163-174.
14. A. G. Benadia, L. Pan, K. S. Bayikadi, Z. Liu, J. A. Peters, G. J. Snyder, M. G. Kanatzidis and Design, *Crystal Growth Design*, 2025, **25**, 9288-9299.
15. X. Sun, G. Zhang, W. Ma, Y. Hua, H. Liu, J. Liu, Z. Yue, X. Wang, J. Song and X. Tao, *Advanced Materials*, 2026, **38**, e12788.
16. Z. Zhang, H. Li, H. Di, D. Liu, W. Jiang, J. Ren, Z. Fan, F. Liao, L. Lei and G. Li, *ACS Applied Electronic Materials*, 2022, **5**, 388-396.
17. S. Liu, Y. Ding, X. Wang, Y. Li, J. Chen, Z. Zhao, Z. Zhu, J. Wu, O. E. Fayemi and B. S. Bae, *Advanced Electronic Materials*, 2024, **10**, 2300555.
18. Y. Liu, Y. Zhang, Z. Yang, J. Feng, Z. Xu, Q. Li, M. Hu, H. Ye, X. Zhang and M. Liu, *Materials Today*, 2019, **22**, 67-75.
19. D. Liu, X. Sun, L. Jiang, X. Jiang, H. Chen, F. Cui, G. Zhang, Y. Wang, Y.-B. Lu and Z. Wu, *Journal of Materials Chemistry A*, 2024, **12**, 12467-12474.
20. W. Wei, Y. Zhang, Q. Xu, H. Wei, Y. Fang, Q. Wang, Y. Deng, T. Li, A. Gruverman and L. Cao, *Nature Photonics*, 2017, **11**, 315-321.
21. W. Tan, Y. Xiao, C. Zhou, X. Jin, S. Zhu, M. Han, Z. Tang, Y. Zhang, Z. Su and T. Chen, *Advanced Functional Materials*, 2024, **34**, 2406839.
22. L. Wang, Y. Yan, M. Bu, J. Wang, L. Li, Y. Li, H. Liu, H. Zhang, X. Pi and D. Yang, *Advanced Functional Materials*, 2025, **35**, 2415378.
23. N. He, L. Zhang, X. He, J. Guo, X. Wu, Q. Li and J. He, *Advanced Optical Materials*, 2024, **12**, 2400707.
24. W. Zhang, H. Wang, Z. Chen, P. Wang, X. Liu, H. Dong, J. Zhao, Y. Cui and Y. Shao, *ACS Applied Materials Interfaces*, 2024, **16**, 12844-12852.

25. P. Wang, H. Wang, J. Fu, H. Dong, W. Zhang, Z. Gao and Y. Shao, *ACS Photonics*, 2024, **11**, 5409-5417.
26. L. Chen, H. Wang, W. Zhang, F. Li, Z. Wang, X. Wang, Y. Shao and J. Shao, *ACS Applied Materials Interfaces*, 2022, **14**, 10917-10926.
27. D. Liu, L. Jiang, X. Jiang, X. Sun, G. Zhang, Y.-B. Lu, Y. Wang, Z. Wu and Z. Ling, *ACS Applied Materials Interfaces*, 2023, **15**, 57846-57855.
28. Z. Chen, H. Wang, J. Fu, P. Wang, X. Liu, H. Dong, S. Yang and Y. Shao, *Journal of Materials Chemistry A*, 2024, **12**, 14446-14455.
29. Q. Xu, A. Datta, K. Becla, P. Becla and S. Motakef, *Chemical Engineering Journal*, 2023, **475**, 146155.
30. M. Hu, Y. Chen, P. Tan, J. Liu, T. Liu, M. Sun, L. Huang, L. Cheng, X. Ma and S. Yu, *IEEE Electron Device Letters*, 2025.
31. M. Han, Y. Xiao, C. Zhou, Z. Xiao, W. Tan, G. Yao, X. Wu, R. Zhuang, S. Deng and Q. Hu, *Advanced Functional Materials*, 2023, **33**, 2303376.
